# Supplementary material for: NUPR1, a new target in liver cancer: implication in controlling cell growth, migration, invasion and sorafenib resistance
Source: PubMed Central journal article supplement (PMC5143401; doi:10.1038/cddis.2016.175), 2016-06-23

# Supplementary Figure 1

**A**

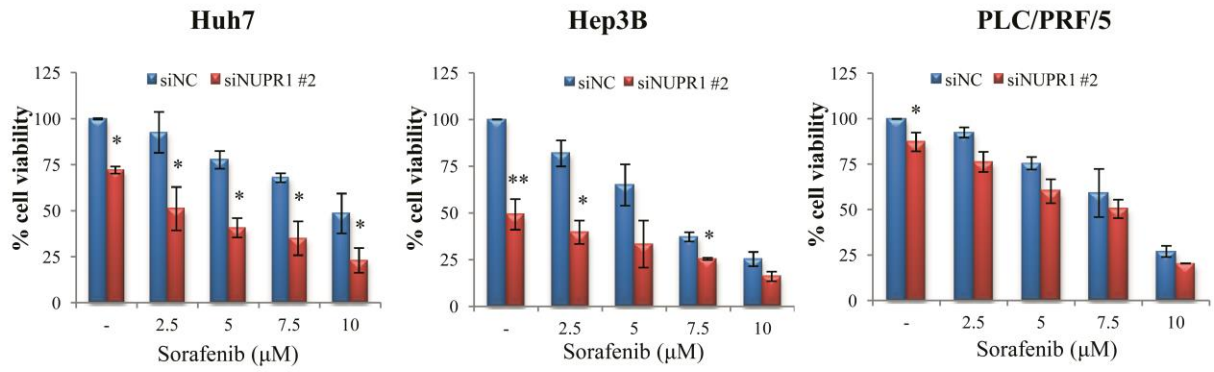

**B**

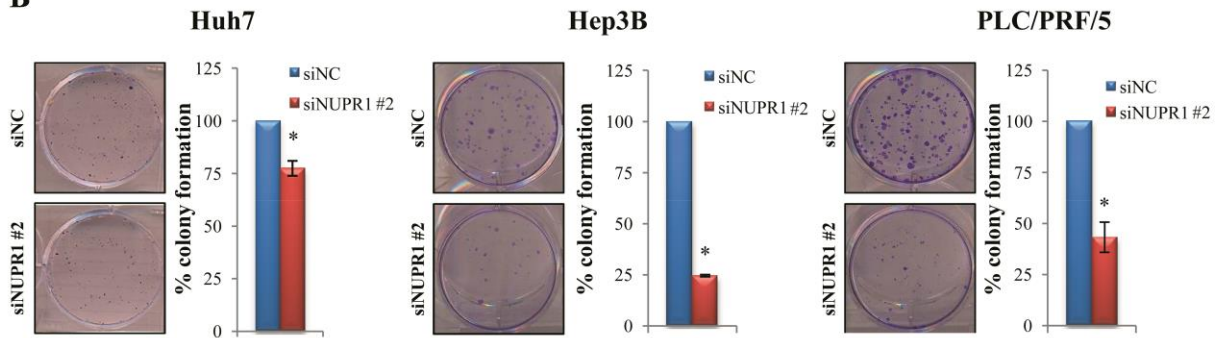

**C**

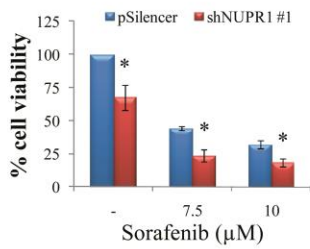

**D**

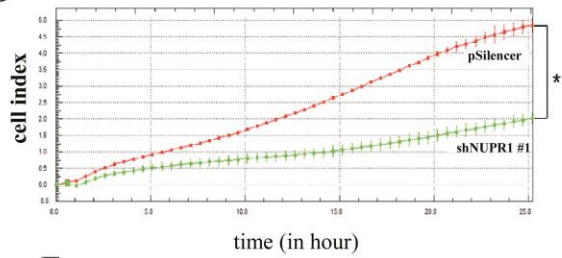

**E**

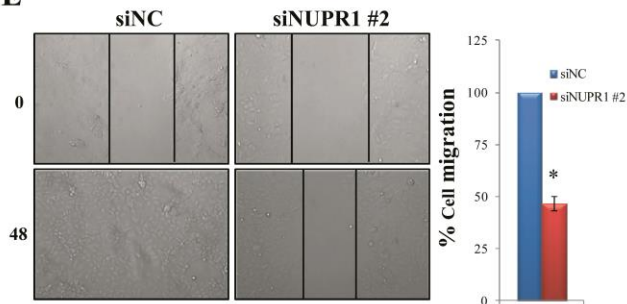

**F**

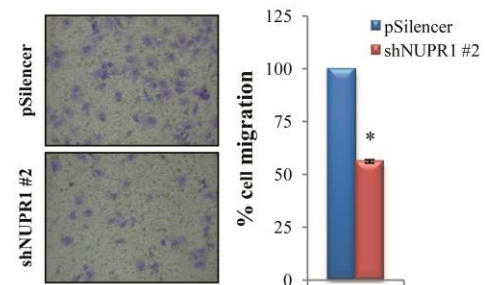

Supplement: cddis2016175x10.pdf [file cddis2016175x10.pdf]
