# Supplementary material for: NUPR1, a new target in liver cancer: implication in controlling cell growth, migration, invasion and sorafenib resistance
Source: PubMed Central journal article supplement (PMC5143401; doi:10.1038/cddis.2016.175), 2016-06-23

Supplementary Figure 2

A

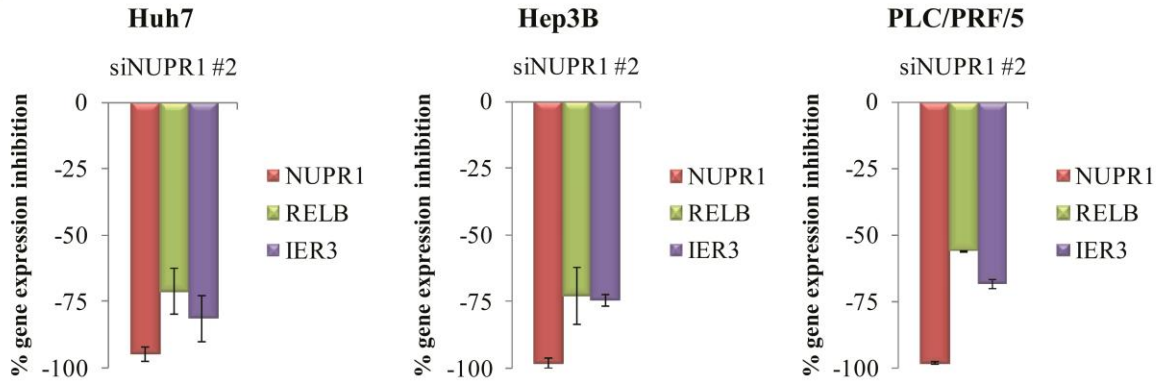

B

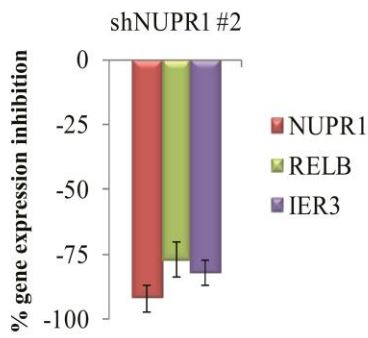

C

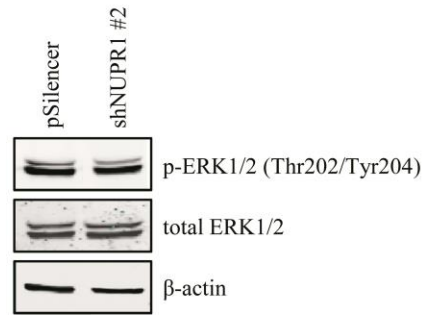

D

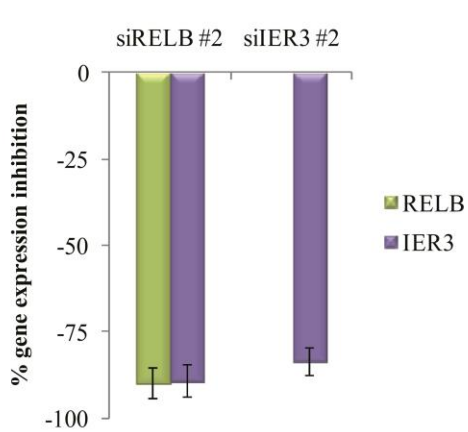

E

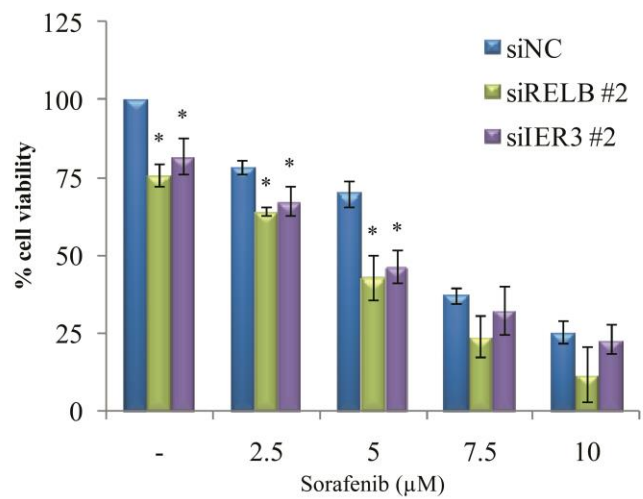

Supplement: cddis2016175x11.pdf [file cddis2016175x11.pdf]
