# Supplementary material for: NUPR1, a new target in liver cancer: implication in controlling cell growth, migration, invasion and sorafenib resistance
Source: PubMed Central journal article supplement (PMC5143401; doi:10.1038/cddis.2016.175), 2016-06-23
Supplement: cddis2016175x13.pdf [file cddis2016175x13.pdf]

Supplementary Figure 4

CTTGGTATGTTGCCTAGGCTGGTCTCGAACTCTGGCCCTCAAGCGATCCTCCCTCCTGGCCCTCCCAAAGGCTGGAAGGCTGAGGTTGG  
GCAGATCATTTGAGGCAGGAGTTTGAGACCAGCCTGGCCAACATGATGAAACCCCATCTCTACTAAAAATACAAAAATTTGGCCAGG  
CGTGGTGGCTGACGCTGTAATCCCAGCACTTTGGGAGGCCAAGGTGGGTGGATCATGAGGTCAAGAGATTGAGACCATCCTGGCCA  
ACATGGTGAACTCTGTTTCTACTAAAAATACAAAAATAGCCAGGCATGGTGGCAGGTGCCTGTAGTCCCAGCTACTCAGGAGGCTG  
AAGCAGGAGAATAGCTTGAACCCAGGAGGCGGAGGTTGCAGTGCAGCTGCGATCATGCCACTGCCTCCAGCCTGAGCAACAGAGTGA  
GACTCTGTATCAAAAAAACAAAAAACAAAAATTAGCCAGGCAGTGGTGGTGTCTCACCTGTAATCCCAGCTACTCAGGGGGCGTAGGC  
ACGAGAATTGCTTGAACCCGGGAGGCAGAGGTTGCAGTGCAGCCAAAGATGGTGCCACTGCCTTAACCTGAGCAACAGAGTGCAGT  
CTGTCTCAAAAAAAATTTAGAGATGGGGTCTTACTATGATGCTCAGGCTGGTCTCAAACTCCTAGGCTCAAGTAATCCTCCACT  
TCGGCTCTAAACTGCTGTGATTACAGGCATGAGCCACTGCTCCAGACTTGTAGTTTTTGTGGTGTGGTGTGGATTTGAGACAGAGTCTC  
CCTCTGTCACCCAGGCTGGAGTGCATGGCACAGTGTCCGGCTCACTGCAACCTTACCTCCTGGGTTCAAGCGATTGACTGCAGCTCAG  
CTCTGAGCAGCTGGGATTACAGGCACCTGCCACCATGCTTGGCTAATTTTTGGTATTTTTAGTGGAGATGGGGTTTACCATTGTGGT  
CAGGCTGGTCTTGAACCTCTGACTTTGTGATCCACCCACTCGGCTCCCAAAGGTGCTGGGATTACAGGCGTGAGCCACTGCCCCCGG  
CCCTGGTTTTAAATTTTTAAATCTCAGTTTTCTGTGACTTTTAGATGGCATAAAGTGCCTTACCTCCTGGGTTACAGCAAGGACAAAT  
CAACAAAAACAGGTGCTGGGGAGGCGTGTTCATGGGCAGTATCGAAAAAAGCAGAAGAAATTCCTTTCCACTACGTAGGAGCC  
CACAGAAATGTATGCACTAAAAATATATGCAAGCAAAAAGCAAAACAAAAAGCTGCATTCACAGCGTAGACCCCTGCAAGAGCAGG  
AACACTCCCTGCCAGATACATACACAAACACAAATACACATCAAAGATGCTCTCAGGCTCATGAATGTGCAGGCACAGGCA  
GCACACACATGCCCAACAAACACAAAGAAACAAAGATGAACACACACCCAAAGCTGTGGCTGCCGTGCTGCTTATTATTGTT  
GCTGCCACCTGGAGGAGCCCAAGTTTCTTGTAGCTTTCTTTTCTGGGGATCTTCTGGCTCTGCCCTCCATTCCAGCCTCTCAC  
TCCCATCTTTCATTTTGTAGGTTGGAGGCGCTTCTGTTAGCCCTCAGAGACTCAGTACGGGGAATAAGTCTTAGGGGTGG  
GGGTGTGGCAAGCCGCGTGGTTCCTGTCTGGTCTTCTCCCTCCGAGTCCCCTCTCTATTGCTGGTGTAGTGTCCATGCTCTG  
GCCTCATCTGGGGGTGAGGAAAAGCAGGTGGTAAAAGGGACAGAGATCTGGGTTCTAATTCTGCCTCCCACTCACTTGTATTGTG  
ACTCCAGGGAAGGCCACCCTCTCTATCCTCAATTTCTGTCTCTGTAAGTCAAATTTCCCTCAATTGGAAAGGTTCTGTGTCCAC  
TTTGTCTGGCCACTAGGAACTCAAAATCAAAATATGCTCGTTTTATTTCTGCTCAAGACAACAGTTGCTGTATCCCTCCTCCCA  
CCCAATCACACACTTCCGCGCTTCTTCTCATGGCAGAAGCACCACTTGAGCTCTCTGGGCCCCGAGCCTTACCTCCAGCTCTGT  
CTCAGCGCGTGCCTCGTTCTTCTCTGAAATCTGCAGCTTTGGTACCAGTTTCTCTCGTGCCCGCAGGGCTGGGGCGGTTG  
GTGTTGGCAGCAGCTTCTCTTTGGTGGCAGCTTTCCGGCTCCACCTCCTGTAACCAAGGCAGGAGTCAGAGGTGAAGTGGGCATAG  
GCATGATGAGAGCCCTGTCAGAGGAGAGGAGGGGTTTAGGTTGGGGATGGGAAGAGCAGGGAAGGCCTGCTGCTTCCCT  
TGTGGAATGTGGGACCCAGATGTGTGTAGGTCCAGGTGAGTAACATAGCACTCCTGGGATAAGGGATTAGACAGGGGGTACGT  
GAGGTCCAAGGAACAGGTTGGCTAGAAAAGGTTGAGTGGCTGGGCAGGGTGGCTACTCCTGTAATCTCAGCATTGGGAGGCC  
AAGGCAGGAGAATGCTTGAAGCCAGGAATTTGGGATCAGCCTGGGAAACATAGTGCAGCCCATCTCACCAGTGCAGGTGGTGTG  
ACCTGAAATTCAGCACTCAGGAGGCTGAAGAGGATGAAAGCAGGATCACTTGAGCCAGGAGTTCGAGGCTGCGGTGATTGATGTT  
GTGATCACTACTGCCTCCAGCTGGGTGACAGAGTGCCTCTCAAAAAAAGAAAGAAAGAAAGAAAGAAAGAAAGAAAGAAAGG  
AAATGAGAGGAACAAGAGGGGTGGTCTGATTTCCGGAGAGAGGAAGGACCGTGGAGATGGCTGAGTGGGCTTACCGAGGTA  
GGAATGGGCCAGGCTATAGAGGTGAGATTATCCAGGCTGGAGTCTCGTCTCCGGGCTGGGGGCTGTGGGGGGCGTGGTTGCT  
GGTGGGAAGGTGGCCATCGTGCCTGGCTTGTCTTCCCTGCCTCTCTTCTCTCAACGCTTGTGCTGCTGCTTCCCTGGCCCGGG  
CCTCTCCACTCCCTCAGTTATAAGGCTGTGTCTCTCTCCAGACCAGTCTGGCTCCAGCCATCAGGCTGTCTGATGCAATCTG  
GCCCTTCCCAAAATCCAGCCAGTAAACACAGTATGAGAGGAAAGATCGGTCCTCGAGTCCAGCCAACTCCTCTCCCTCC  
CAGGCTACCCAGCTGGATTTTTCCATAGAGGAGTCCGCTTCTGGCAGAAAGCAGGAAAGAGGAGGATGGGCTTAAACAC  
TCGTTGGGATCATGGCTCACCTGATCGAGGGCTTACCTGGGCTGGGATGACGGCCACACAGCTAACCCGGCACCCTAAATCTCG  
CTGAGATGCAGGACGTGAGGAAGGAGGGGAAGGATATAGCACACTTGTGCCAGGACAAGTCAAGTGGCTTCCACCCAGTACA  
CTCAACATCTGTCTTCTTTTTTTTTTTTTGAAATGGAGTCTGTCGCCCCGGTGGAGTGCAGTGGTGTGATCTTGGCTCACTGCA  
ACCTGCAACCTCCTCTCCAGCTTCAAGCAATTTCTCTGGCTCAGCTCCGAAATAGCTGGGATTATAGACATGTCCACCATGCTG  
GCTAATTTTTGATTTTTAGTAGAGATGGGGTTTACCATTGTGGACAGGCTGATCTTGAATCTTGACTTAAATCTGACTGCTGCT  
CGGCTCCCAAAGTGTGGGATTACAGGCATGAGCCACACCCTTTTTTTTCTTATGAGAAACATCTTGGAAAACCCCTAATA  
TCTTGAACAGGGTCCCAGTAATGTAATCTCCCTCCTAGGAGGAGGGTGGCAGAGGTTGGAGTTTCAAGGTTGAGGCCAGT  
TGCCCTCAGTTCAATCCCTGACCCACTTTCCGTGTGACCTTGGCGAGTCCCTTACCTCTGTGGCTTGGTTTCCGAAATCTGTA  
AAATAAGGATGATAATAATTGATCTTCTTCTAGAGTTGGGAGAGGATCAAATGAGATAATGTTGAAAGACACATGTACAGTGC  
CCGGTGACAGAGGGAGACCCTGTCTCAAAAAAATAATAATAAATAATATGATTTCAAAATATGGATGTACTGAGGCAGAAGAC  
ACAATGAGGCCGAGCTGGTGGCTTATGCCTGTAGTCCAGCACTTTGGGAGATCCAAAAGTGGGTGGATCCTGAGGTGAGGAG  
TTCAAGACCAGCTGGCCAACATGGCGAAATCCATCTCTACTAAAAATACAAAAATAGCCTGGTGTGGTGGCAAGTGCCTGTAATC  
CCAGTACTCAGGAGGCTGAGGCAGGAGAAATCGCTTGAACCTGGGAGGGAGAGGTTGTGGTGGAGCTGAGACTGCCACTCC  
AGCCTCAGCAACAGAAATGAGACTGTGTCTGAAAACAAAAACAAAAACAAAAAGCTGAATCTGCTTGTGTTTCTCCCTTGCCTGA  
GCCGAAATGAAATTTAGCCTTGTGTTTCCAGATTGGATGATGATGATGTTCCAAACACCCAGGAAATGAAAGTGAAGACAGGATA  
CTTGAATGAAACAGGATTGGGCAATAATAACAGACCAGGTGATCAGAGAAAGAGGAAATAATCTTAAATTAAGCAAAGATTGG  
CCTAAGTGGCTGACTATGCCTGTAATTTCCAGGGCTCTGGGAGGTAAGCTGGGAGGATTGGTTGAAAGCTGGGAGTTCAAGGCCAGT  
TGGCAATAGAGCAAGACTCCTTTTTTTGTGGTGTGGTTGTTTTGTTTTGTTTGTAGACAGAGTCTCACTGTCCACAGGCTGGAGT  
CAGTGGTATGATCTCGGCTCACTGCAACCTCCGCTCTGGTTCAAGTATTCTCTGCCTAGCCTCTGAGTAGCTGGGATTACAG  
GCTTGTGCCACCACGCCGGCTAATTTTTATTTTTAGTAGAGACGGGGTTACACCAGTGGCCAGGCTGGTCTCGAACTCCTGACC  
TCAGGTGATCTGCCCGCTCGGCTCCCAAAGTGTGGGATTACAGGCGTGCAGCCACTGGCCAGTATCTTTTTATTGTTGCTTTA  
CCATTTTTGTCCTCCACTGGCATGCAACCGTTGGTTTGTGTTAGTTAAGTAAAGGAGTGGCTTGGAAACAGGCTTCTCAGGCT  
AAAGCTTGGTTCTGCCCTAGTGTGCTGCTTAGACAAGCTTAGTCTGCATGTTTGTACTCGTCTATACAGTGGGATTAAT  
GGCAGTGGCTGGATAAGGTGAGGCACACTGCAATCCCACTGTTTTGAAAGGCTGAGGTGGAAGGATCACTGAGGTTGAGGTTG  
TGAGCTGCGGTTGAGTATGATCGTGCCTGCACTCGAAAAAAGAAAAAGAAAGGTTGGGCGGCGCAGGTAGTCTACACCT  
GTAATCCAGCACTTTGGGAGGCGAGGTGGTGGATCACAGATCAGGAGTTGCAGACCAGCTAGCTAAAAATGGTGAACCCCGT  
CTCTACTAAAAATACAAAAATACCTAGGCGTGGTGGTGTGCTGTAATCCAGCTACTCAGCAGGCTGAGGCAGTGAATCGCTT  
GAACCCAGGAGGCAGAGGTTGCGGTTGAGTAAAGATCGGCCACTGCCTCAGCCTGGACGACAGAGTGCAGCCGGTCTCAAAAA  
AAAAAAAATGCTTAGCGCAGTGCCTAGAAGATAATCAGTGTGCAATAAATGCTTGCTATTTTAATTATCATTATCTCGGGCAGG  
AATCTTG
